# Supplementary material
Source: publisher figshare collection journal article supplement (https://acs.figshare.com/ndownloader/files/30743996)
Supplement: Supplementary file 1 [file 30743996]

## Sheet: Sheet1
									m/z
					98.5	99	99.5	100	100.5	101	101.5	102	102.5
															@ 100.0		Sum
Raw Data		31.32													0		0
		31.2													0		0
		31.08						4							4		4			original shape of the peak
		30.96					2	10	7	3					10		22
		30.84					3	14	10	5	2				14		34
	Drift time [ms]	30.72				1	4	20	18	8	3	1			20		55
		30.6					1	12	10	6	1				12		30
		30.48						8	1						8		9
		30.36						2							2		2
		30.24													0		0
		30.12													0		0
		30													0		0
			@ 30.72		0	1	4	20	18	8	3	1	0
			Sum		0	1	10	70	46	22	6	1	0
									m/z																		m/z
Moving Average Smoothing					98.5	99	99.5	100	100.5	101	101.5	102	102.5										98.5	99	99.5	100	100.5	101	101.5	102	102.5
Drift dimension	none														@ 100.0		Sum		3														@ 100.0		Sum
		31.32			0	0	0	0	0	0	0	0	0		0		0			31.32													0		0
		31.2			0	0	0	0	0	0	0	0	0		0		0			31.2			0	0	0	1.33333	0	0	0	0	0		1.33333		1.33333
		31.08			0	0	0	4	0	0	0	0	0		4		4			31.08			0	0	0.666667	4.66667	2.33333	1	0	0	0		4.66667		8.66667
		30.96			0	0	2	10	7	3	0	0	0		10		22			30.96			0	0	1.66667	9.33333	5.66667	2.66667	0.666667	0	0		9.33333		20
		30.84			0	0	3	14	10	5	2	0	0		14		34			30.84			0	0.333333	3	14.6667	11.6667	5.33333	1.66667	0.333333	0		14.6667		37
		30.72			0	1	4	20	16	8	3	1	0		20		53			30.72			0	0.333333	2.66667	15.3333	12.6667	6.33333	2	0.333333	0		15.3333		39.6667
		30.6			0	0	1	12	8	6	1	0	0		12		28			30.6			0	0.333333	1.66667	13.3333	9.66667	4.66667	1.33333	0.333333	0		13.3333		31.3333
		30.48			0	0	0	8	1	0	0	0	0		8		9			30.48			0	0	0.333333	7.33333	3.66667	2	0.333333	0	0		7.33333		13.6667
		30.36			0	0	0	2	0	0	0	0	0		2		2			30.36			0	0	0	3.33333	0.333333	0	0	0	0		3.33333		3.66667
		30.24			0	0	0	0	0	0	0	0	0		0		0			30.24			0	0	0	0.666667	0	0	0	0	0		0.666667		0.666667
		30.12			0	0	0	0	0	0	0	0	0		0		0			30.12			0	0	0	0	0	0	0	0	0		0		0
		30			0	0	0	0	0	0	0	0	0		0		0			30													0		0
			@ 30.72		0	1	4	20	16	8	3	1	0								@ 30.72		0	0.333333	2.66667	15.3333	12.6667	6.33333	2	0.333333	0
			Sum		0	1	10	70	42	22	6	1	0								Sum		0	1	10	70	46	22	6	1	0
Moving Average Smoothing					98.5	99	99.5	100	100.5	101	101.5	102	102.5										98.5	99	99.5	100	100.5	101	101.5	102	102.5
Drift dimension	none														@ 100.0		Sum		3														@ 100.0		Sum
Threshold	5	31.32			0	0	0	0	0	0	0	0	0		0		0		5	31.32			0	0	0	0	0	0	0	0	0		0		0
		31.2			0	0	0	0	0	0	0	0	0		0		0			31.2			0	0	0	0	0	0	0	0	0		0		0
		31.08			0	0	0	0	0	0	0	0	0		0		0			31.08			0	0	0	0	0	0	0	0	0		0		0
		30.96			0	0	0	10	7	0	0	0	0		10		17			30.96			0	0	0	9.33333	5.66667	0	0	0	0		9.33333		15
		30.84			0	0	0	14	10	5	0	0	0		14		29			30.84			0	0	0	14.6667	11.6667	5.33333	0	0	0		14.6667		31.6667
		30.72			0	0	0	20	16	8	0	0	0		20		44			30.72			0	0	0	15.3333	12.6667	6.33333	0	0	0		15.3333		34.3333
		30.6			0	0	0	12	8	6	0	0	0		12		26			30.6			0	0	0	13.3333	9.66667	0	0	0	0		13.3333		23
		30.48			0	0	0	8	0	0	0	0	0		8		8			30.48			0	0	0	7.33333	0	0	0	0	0		7.33333		7.33333
		30.36			0	0	0	0	0	0	0	0	0		0		0			30.36			0	0	0	0	0	0	0	0	0		0		0
		30.24			0	0	0	0	0	0	0	0	0		0		0			30.24			0	0	0	0	0	0	0	0	0		0		0
		30.12			0	0	0	0	0	0	0	0	0		0		0			30.12			0	0	0	0	0	0	0	0	0		0		0
		30			0	0	0	0	0	0	0	0	0		0		0			30			0	0	0	0	0	0	0	0	0		0		0
			@ 30.72		0	0	0	20	16	8	0	0	0								@ 30.72		0	0	0	15.3333	12.6667	6.33333	0	0	0
			Sum		0	0	0	64	41	19	0	0	0								Sum		0	0	0	60	39.6667	11.6667	0	0	0
					98.5	99	99.5	100	100.5	101	101.5	102	102.5										98.5	99	99.5	100	100.5	101	101.5	102	102.5
															@ 100.0		Sum																@ 100.0		Sum
Moving Average Smoothing		31.32			0	0	0	0	0	0	0	0	0		0		0			31.32			0	0	0	0	0	0	0	0	0		0		0
Drift dimension	none	31.2			0	0	0	0	0	0	0	0	0		0		0		3	31.2			0	0	0	0	0	0	0	0	0		0		0
Threshold	5	31.08			0	0	0	0	0	0	0	0	0		0		0		5	31.08			0	0	0	0	0	0	0	0	0		0		0
Remove Spikes		30.96			0	0	0	0	0	0	0	0	0		0		0		Remove Spikes	30.96			0	0	0	0	0	0	0	0	0		0		0
less than 2 neighbors in each dimension		30.84			0	0	0	0	10	0	0	0	0		0		10		less than 2 neighbors in each dimension	30.84			0	0	0	0	11.6667	0	0	0	0		0		11.6667
		30.72			0	0	0	0	16	0	0	0	0		0		16			30.72			0	0	0	0	12.6667	0	0	0	0		0		12.6667
		30.6			0	0	0	0	0	0	0	0	0		0		0			30.6			0	0	0	0	0	0	0	0	0		0		0
		30.48			0	0	0	0	0	0	0	0	0		0		0			30.48			0	0	0	0	0	0	0	0	0		0		0
		30.36			0	0	0	0	0	0	0	0	0		0		0			30.36			0	0	0	0	0	0	0	0	0		0		0
		30.24			0	0	0	0	0	0	0	0	0		0		0			30.24			0	0	0	0	0	0	0	0	0		0		0
		30.12			0	0	0	0	0	0	0	0	0		0		0			30.12			0	0	0	0	0	0	0	0	0		0		0
		30			0	0	0	0	0	0	0	0	0		0		0			30			0	0	0	0	0	0	0	0	0		0		0
			@ 30.72		0	0	0	0	16	0	0	0	0								@ 30.72		0	0	0	0	12.6667	0	0	0	0
			Sum		0	0	0	0	26	0	0	0	0								Sum		0	0	0	0	24.3333	0	0	0	0
					98.5	99	99.5	100	100.5	101	101.5	102	102.5										98.5	99	99.5	100	100.5	101	101.5	102	102.5
															@ 100.0		Sum																@ 100.0		Sum
Moving Average Smoothing		31.32			0	0	0	0	0	0	0	0	0		0		0			31.32			0	0	0	0	0	0	0	0	0		0		0
Drift dimension	none	31.2			0	0	0	0	0	0	0	0	0		0		0		3	31.2			0	0	0	0	0	0	0	0	0		0		0
Threshold	5	31.08			0	0	0	0	0	0	0	0	0		0		0		5	31.08			0	0	0	0	0	0	0	0	0		0		0
Remove Spikes		30.96			0	0	0	10	7	0	0	0	0		10		17		Remove Spikes	30.96			0	0	0	9.33333	5.66667	0	0	0	0		9.33333		15
less than 2 neighbors in each dimension		30.84			0	0	0	14	10	5	0	0	0		14		29		less than 2 neighbors in each dimension	30.84			0	0	0	14.6667	11.6667	5.33333	0	0	0		14.6667		31.6667
		30.72			0	0	0	20	16	8	0	0	0		20		44			30.72			0	0	0	15.3333	12.6667	6.33333	0	0	0		15.3333		34.3333
		30.6			0	0	0	12	8	6	0	0	0		12		26			30.6			0	0	0	13.3333	9.66667	0	0	0	0		13.3333		23
		30.48			0	0	0	0	0	0	0	0	0		0		0			30.48			0	0	0	0	0	0	0	0	0		0		0
		30.36			0	0	0	0	0	0	0	0	0		0		0			30.36			0	0	0	0	0	0	0	0	0		0		0
		30.24			0	0	0	0	0	0	0	0	0		0		0			30.24			0	0	0	0	0	0	0	0	0		0		0
		30.12			0	0	0	0	0	0	0	0	0		0		0			30.12			0	0	0	0	0	0	0	0	0		0		0
		30			0	0	0	0	0	0	0	0	0		0		0			30			0	0	0	0	0	0	0	0	0		0		0
			@ 30.72		0	0	0	20	16	8	0	0	0								@ 30.72		0	0	0	15.3333	12.6667	6.33333	0	0	0
			Sum		0	0	0	56	41	19	0	0	0								Sum		0	0	0	52.6667	39.6667	11.6667	0	0	0
